# Supplementary material for: Species conservation profiles of the endemic spiders Troglohyphantes (Araneae, Linyphiidae) from the Alps and the north-western Dinarides
Source: Biodivers Data J. 2022 Aug 19;10:e87261. doi: 10.3897/BDJ.10.e87261 (PMC9848466; doi:10.3897/BDJ.10.e87261)
Supplement: Supplementary material 11 — Distribution of Troglohyphantesconfusus Kratochvíl, 1939 [file bdj-10-e87261-s011.kml]

<?xml version="1.0" encoding="UTF-8"?>
<kml xmlns="http://earth.google.com/kml/2.2">
<Document>
<name></name>
<description><![CDATA[]]></description>

<Style id="1">
<LineStyle>
<width>2</width>
<color>ff0000ff</color>
</LineStyle>
<PolyStyle>
<color>aaffffff</color>
<fill>1</fill>
</PolyStyle>
</Style>

<Placemark>
<name>T.confusus.kml</name>
<description><![CDATA[]]></description>
<styleUrl>#1</styleUrl>
<visibility>1</visibility>
<MultiGeometry>
<Polygon>
<outerBoundaryIs>
<LinearRing>
<coordinates>
14.29354,45.8504
14.2941742391966,45.8503798667647
14.2948059245357,45.8503195481283
14.2954325124436,45.8502192869726
14.2960514798718,45.850079487014
14.296660334457,45.8499007111774
14.2972566245566,45.8496836793302
14.2978379491209,45.8494292653829
14.298401967361,45.8491384937707
14.2989464081746,45.8488125353283
14.2994690792905,45.8484527025753
14.2999678760969,45.8480604444312
14.3004407901148,45.8476373403811
14.3008859170866,45.8471850941156
14.3013014646429,45.8467055266708
14.3016857595205,45.8462005690957
14.3020372542995,45.8456722546761
14.3023545336345,45.8451227107477
14.3026363199535,45.84455415013
14.3028814786027,45.8439688622159
14.3030890224144,45.8433692037533
14.3032581156832,45.8427575893551
14.3033880775301,45.8421364817767
14.3034783846446,45.841508381999
14.3035286733918,45.8408758191582
14.3035387412767,45.8402413403617
14.3035085477595,45.8396075004314
14.3034382144188,45.8389768516173
14.3033280244621,45.8383519333194
14.3031784215856,45.8377352618631
14.3029900081871,45.8371293203668
14.302763542941,45.8365365487431
14.3024999377429,45.8359593338739
14.3022002540378,45.8354
14.3018656985463,45.8348607993613
14.3014976184053,45.8343439031286
14.3010974957435,45.8338513926605
14.3006669417138,45.8333852511229
14.3002076900052,45.8329473555032
14.2997215898622,45.8325394690526
14.2992105986386,45.8321632341857
14.2986767739157,45.8318201658677
14.2981222652173,45.8315116455135
14.2975493053541,45.8312389154257
14.2969602014333,45.8310030737921
14.2963573255684,45.8308050702639
14.2957431053279,45.8306457021312
14.2951200139597,45.8305256111132
14.294490560433,45.8304452807743
14.293857279335,45.8304050345762
14.293222720665,45.8304050345762
14.292589439567,45.8304452807743
14.2919599860403,45.8305256111132
14.2913368946721,45.8306457021312
14.2907226744316,45.8308050702639
14.2901197985667,45.8310030737921
14.2895306946459,45.8312389154257
14.2889577347827,45.8315116455135
14.2884032260843,45.8318201658677
14.2878694013614,45.8321632341857
14.2873584101378,45.8325394690526
14.2868723099948,45.8329473555032
14.2864130582862,45.8333852511229
14.2859825042565,45.8338513926605
14.2855823815947,45.8343439031286
14.2852143014537,45.8348607993613
14.2848797459622,45.8354
14.2845800622571,45.8359593338739
14.284316457059,45.8365365487431
14.2840899918129,45.8371293203668
14.2839015784144,45.8377352618631
14.2837519755379,45.8383519333194
14.2836417855812,45.8389768516173
14.2835714522405,45.8396075004314
14.2835412587233,45.8402413403617
14.2835513266082,45.8408758191582
14.2836016153554,45.841508381999
14.2836919224699,45.8421364817767
14.2838218843168,45.8427575893551
14.2839909775856,45.8433692037533
14.2841985213973,45.8439688622159
14.2844436800465,45.84455415013
14.2847254663655,45.8451227107477
14.2850427457005,45.8456722546761
14.2853942404795,45.8462005690957
14.2857785353571,45.8467055266708
14.2861940829134,45.8471850941156
14.2866392098852,45.8476373403811
14.2871121239031,45.8480604444312
14.2876109207095,45.8484527025753
14.2881335918254,45.8488125353283
14.288678032639,45.8491384937707
14.2892420508791,45.8494292653829
14.2898233754434,45.8496836793302
14.290419665543,45.8499007111774
14.2910285201282,45.850079487014
14.2916474875564,45.8502192869726
14.2922740754643,45.8503195481283
14.2929057608034,45.8503798667647
14.29354,45.8504
</coordinates>
</LinearRing>
</outerBoundaryIs>
</Polygon>
<Polygon>
<outerBoundaryIs>
<LinearRing>
<coordinates>
14.2094,46.0583
14.2100342391966,46.0582798667647
14.2106659245357,46.0582195481283
14.2112925124436,46.0581192869726
14.2119114798718,46.057979487014
14.212520334457,46.0578007111774
14.2131166245566,46.0575836793302
14.2136979491209,46.0573292653829
14.214261967361,46.0570384937707
14.2148064081746,46.0567125353283
14.2153290792905,46.0563527025753
14.2158278760969,46.0559604444312
14.2163007901148,46.0555373403811
14.2167459170866,46.0550850941156
14.2171614646429,46.0546055266708
14.2175457595205,46.0541005690957
14.2178972542995,46.0535722546761
14.2182145336345,46.0530227107477
14.2184963199535,46.05245415013
14.2187414786027,46.0518688622159
14.2189490224144,46.0512692037533
14.2191181156832,46.0506575893551
14.2192480775301,46.0500364817767
14.2193383846446,46.049408381999
14.2193886733918,46.0487758191582
14.2193987412767,46.0481413403617
14.2193685477595,46.0475075004314
14.2192982144188,46.0468768516173
14.2191880244621,46.0462519333193
14.2190384215856,46.0456352618631
14.2188500081871,46.0450293203668
14.218623542941,46.0444365487431
14.2183599377429,46.0438593338739
14.2180602540378,46.0433
14.2177256985463,46.0427607993613
14.2173576184053,46.0422439031286
14.2169574957435,46.0417513926605
14.2165269417138,46.0412852511229
14.2160676900052,46.0408473555032
14.2155815898622,46.0404394690526
14.2150705986386,46.0400632341857
14.2145367739157,46.0397201658676
14.2139822652173,46.0394116455134
14.2134093053541,46.0391389154257
14.2128202014333,46.0389030737921
14.2122173255684,46.0387050702639
14.2116031053279,46.0385457021311
14.2109800139597,46.0384256111132
14.210350560433,46.0383452807743
14.209717279335,46.0383050345762
14.209082720665,46.0383050345762
14.208449439567,46.0383452807743
14.2078199860403,46.0384256111132
14.2071968946721,46.0385457021311
14.2065826744316,46.0387050702639
14.2059797985667,46.0389030737921
14.2053906946459,46.0391389154257
14.2048177347827,46.0394116455134
14.2042632260843,46.0397201658676
14.2037294013614,46.0400632341857
14.2032184101378,46.0404394690526
14.2027323099948,46.0408473555032
14.2022730582862,46.0412852511229
14.2018425042565,46.0417513926605
14.2014423815947,46.0422439031286
14.2010743014537,46.0427607993613
14.2007397459622,46.0433
14.2004400622571,46.0438593338739
14.200176457059,46.0444365487431
14.1999499918129,46.0450293203668
14.1997615784144,46.0456352618631
14.1996119755379,46.0462519333193
14.1995017855812,46.0468768516173
14.1994314522405,46.0475075004314
14.1994012587233,46.0481413403617
14.1994113266082,46.0487758191582
14.1994616153554,46.049408381999
14.1995519224699,46.0500364817767
14.1996818843168,46.0506575893551
14.1998509775856,46.0512692037533
14.2000585213973,46.0518688622159
14.2003036800465,46.05245415013
14.2005854663655,46.0530227107477
14.2009027457005,46.0535722546761
14.2012542404795,46.0541005690957
14.2016385353571,46.0546055266708
14.2020540829134,46.0550850941156
14.2024992098852,46.0555373403811
14.2029721239031,46.0559604444312
14.2034709207095,46.0563527025753
14.2039935918254,46.0567125353283
14.204538032639,46.0570384937707
14.2051020508791,46.0573292653829
14.2056833754434,46.0575836793302
14.206279665543,46.0578007111774
14.2068885201282,46.057979487014
14.2075074875564,46.0581192869726
14.2081340754643,46.0582195481283
14.2087657608034,46.0582798667647
14.2094,46.0583
</coordinates>
</LinearRing>
</outerBoundaryIs>
</Polygon>
<Polygon>
<outerBoundaryIs>
<LinearRing>
<coordinates>
14.20057,46.056768
14.2012042391966,46.0567478667647
14.2018359245357,46.0566875481283
14.2024625124436,46.0565872869726
14.2030814798718,46.056447487014
14.203690334457,46.0562687111774
14.2042866245566,46.0560516793302
14.2048679491209,46.0557972653829
14.205431967361,46.0555064937707
14.2059764081746,46.0551805353283
14.2064990792905,46.0548207025753
14.2069978760969,46.0544284444312
14.2074707901148,46.0540053403811
14.2079159170866,46.0535530941156
14.2083314646429,46.0530735266708
14.2087157595205,46.0525685690957
14.2090672542995,46.0520402546761
14.2093845336345,46.0514907107477
14.2096663199535,46.05092215013
14.2099114786027,46.0503368622159
14.2101190224144,46.0497372037533
14.2102881156832,46.0491255893551
14.2104180775301,46.0485044817767
14.2105083846446,46.047876381999
14.2105586733918,46.0472438191582
14.2105687412767,46.0466093403617
14.2105385477595,46.0459755004314
14.2104682144188,46.0453448516173
14.2103580244621,46.0447199333193
14.2102084215856,46.0441032618631
14.2100200081871,46.0434973203668
14.209793542941,46.0429045487431
14.2095299377429,46.0423273338739
14.2092302540378,46.041768
14.2088956985463,46.0412287993613
14.2085276184053,46.0407119031286
14.2081274957435,46.0402193926605
14.2076969417138,46.0397532511229
14.2072376900052,46.0393153555032
14.2067515898622,46.0389074690526
14.2062405986386,46.0385312341857
14.2057067739157,46.0381881658677
14.2051522652173,46.0378796455134
14.2045793053541,46.0376069154257
14.2039902014333,46.0373710737921
14.2033873255684,46.0371730702639
14.2027731053279,46.0370137021311
14.2021500139597,46.0368936111132
14.201520560433,46.0368132807743
14.200887279335,46.0367730345762
14.200252720665,46.0367730345762
14.199619439567,46.0368132807743
14.1989899860403,46.0368936111132
14.1983668946721,46.0370137021311
14.1977526744316,46.0371730702639
14.1971497985667,46.0373710737921
14.1965606946459,46.0376069154257
14.1959877347827,46.0378796455134
14.1954332260843,46.0381881658677
14.1948994013614,46.0385312341857
14.1943884101378,46.0389074690526
14.1939023099948,46.0393153555032
14.1934430582862,46.0397532511229
14.1930125042565,46.0402193926605
14.1926123815947,46.0407119031286
14.1922443014537,46.0412287993613
14.1919097459622,46.041768
14.1916100622571,46.0423273338739
14.191346457059,46.0429045487431
14.1911199918129,46.0434973203668
14.1909315784144,46.0441032618631
14.1907819755379,46.0447199333193
14.1906717855812,46.0453448516173
14.1906014522405,46.0459755004314
14.1905712587233,46.0466093403617
14.1905813266082,46.0472438191582
14.1906316153554,46.047876381999
14.1907219224699,46.0485044817767
14.1908518843168,46.0491255893551
14.1910209775856,46.0497372037533
14.1912285213973,46.0503368622159
14.1914736800465,46.05092215013
14.1917554663655,46.0514907107477
14.1920727457005,46.0520402546761
14.1924242404795,46.0525685690957
14.1928085353571,46.0530735266708
14.1932240829134,46.0535530941156
14.1936692098852,46.0540053403811
14.1941421239031,46.0544284444312
14.1946409207095,46.0548207025753
14.1951635918254,46.0551805353283
14.195708032639,46.0555064937707
14.1962720508791,46.0557972653829
14.1968533754434,46.0560516793302
14.197449665543,46.0562687111774
14.1980585201282,46.056447487014
14.1986774875564,46.0565872869726
14.1993040754643,46.0566875481283
14.1999357608034,46.0567478667647
14.20057,46.056768
</coordinates>
</LinearRing>
</outerBoundaryIs>
</Polygon>
<Polygon>
<outerBoundaryIs>
<LinearRing>
<coordinates>
14.180205,46.098909
14.1808392391966,46.0988888667647
14.1814709245357,46.0988285481283
14.1820975124436,46.0987282869726
14.1827164798718,46.098588487014
14.183325334457,46.0984097111774
14.1839216245566,46.0981926793302
14.1845029491209,46.0979382653829
14.185066967361,46.0976474937707
14.1856114081746,46.0973215353283
14.1861340792905,46.0969617025753
14.1866328760969,46.0965694444312
14.1871057901148,46.0961463403811
14.1875509170866,46.0956940941156
14.1879664646429,46.0952145266708
14.1883507595205,46.0947095690957
14.1887022542995,46.0941812546761
14.1890195336345,46.0936317107477
14.1893013199535,46.09306315013
14.1895464786027,46.0924778622159
14.1897540224144,46.0918782037533
14.1899231156832,46.0912665893551
14.1900530775301,46.0906454817767
14.1901433846446,46.090017381999
14.1901936733918,46.0893848191582
14.1902037412767,46.0887503403617
14.1901735477595,46.0881165004314
14.1901032144188,46.0874858516173
14.1899930244621,46.0868609333194
14.1898434215856,46.0862442618631
14.1896550081871,46.0856383203668
14.189428542941,46.0850455487431
14.1891649377429,46.0844683338739
14.1888652540378,46.083909
14.1885306985463,46.0833697993613
14.1881626184053,46.0828529031286
14.1877624957435,46.0823603926605
14.1873319417138,46.0818942511229
14.1868726900052,46.0814563555032
14.1863865898622,46.0810484690526
14.1858755986386,46.0806722341857
14.1853417739157,46.0803291658677
14.1847872652173,46.0800206455135
14.1842143053541,46.0797479154257
14.1836252014333,46.0795120737921
14.1830223255684,46.0793140702639
14.1824081053279,46.0791547021311
14.1817850139597,46.0790346111132
14.181155560433,46.0789542807743
14.180522279335,46.0789140345762
14.179887720665,46.0789140345762
14.179254439567,46.0789542807743
14.1786249860403,46.0790346111132
14.1780018946721,46.0791547021311
14.1773876744316,46.0793140702639
14.1767847985667,46.0795120737921
14.1761956946459,46.0797479154257
14.1756227347827,46.0800206455135
14.1750682260843,46.0803291658677
14.1745344013614,46.0806722341857
14.1740234101378,46.0810484690526
14.1735373099948,46.0814563555032
14.1730780582862,46.0818942511229
14.1726475042565,46.0823603926605
14.1722473815947,46.0828529031286
14.1718793014537,46.0833697993613
14.1715447459622,46.083909
14.1712450622571,46.0844683338739
14.170981457059,46.0850455487431
14.1707549918129,46.0856383203668
14.1705665784144,46.0862442618631
14.1704169755379,46.0868609333194
14.1703067855812,46.0874858516173
14.1702364522405,46.0881165004314
14.1702062587233,46.0887503403617
14.1702163266082,46.0893848191582
14.1702666153554,46.090017381999
14.1703569224699,46.0906454817767
14.1704868843168,46.0912665893551
14.1706559775856,46.0918782037533
14.1708635213973,46.0924778622159
14.1711086800465,46.09306315013
14.1713904663655,46.0936317107477
14.1717077457005,46.0941812546761
14.1720592404795,46.0947095690957
14.1724435353571,46.0952145266708
14.1728590829134,46.0956940941156
14.1733042098852,46.0961463403811
14.1737771239031,46.0965694444312
14.1742759207095,46.0969617025753
14.1747985918254,46.0973215353283
14.175343032639,46.0976474937707
14.1759070508791,46.0979382653829
14.1764883754434,46.0981926793302
14.177084665543,46.0984097111774
14.1776935201282,46.098588487014
14.1783124875564,46.0987282869726
14.1789390754643,46.0988285481283
14.1795707608034,46.0988888667647
14.180205,46.098909
</coordinates>
</LinearRing>
</outerBoundaryIs>
</Polygon>
<Polygon>
<outerBoundaryIs>
<LinearRing>
<coordinates>
14.188558,46.09597
14.1891922391966,46.0959498667647
14.1898239245357,46.0958895481283
14.1904505124436,46.0957892869726
14.1910694798718,46.095649487014
14.191678334457,46.0954707111774
14.1922746245566,46.0952536793302
14.1928559491209,46.0949992653829
14.193419967361,46.0947084937707
14.1939644081746,46.0943825353283
14.1944870792905,46.0940227025753
14.1949858760969,46.0936304444312
14.1954587901148,46.0932073403811
14.1959039170866,46.0927550941156
14.1963194646429,46.0922755266708
14.1967037595205,46.0917705690957
14.1970552542995,46.0912422546761
14.1973725336345,46.0906927107477
14.1976543199535,46.09012415013
14.1978994786027,46.0895388622159
14.1981070224144,46.0889392037533
14.1982761156832,46.0883275893551
14.1984060775301,46.0877064817767
14.1984963846446,46.087078381999
14.1985466733918,46.0864458191582
14.1985567412767,46.0858113403617
14.1985265477595,46.0851775004314
14.1984562144188,46.0845468516173
14.1983460244621,46.0839219333194
14.1981964215856,46.0833052618631
14.1980080081871,46.0826993203668
14.197781542941,46.0821065487431
14.1975179377429,46.0815293338739
14.1972182540378,46.08097
14.1968836985463,46.0804307993613
14.1965156184053,46.0799139031286
14.1961154957435,46.0794213926605
14.1956849417138,46.0789552511229
14.1952256900052,46.0785173555032
14.1947395898622,46.0781094690526
14.1942285986386,46.0777332341857
14.1936947739157,46.0773901658677
14.1931402652173,46.0770816455135
14.1925673053541,46.0768089154257
14.1919782014333,46.0765730737921
14.1913753255684,46.0763750702639
14.1907611053279,46.0762157021312
14.1901380139597,46.0760956111132
14.189508560433,46.0760152807743
14.188875279335,46.0759750345762
14.188240720665,46.0759750345762
14.187607439567,46.0760152807743
14.1869779860403,46.0760956111132
14.1863548946721,46.0762157021312
14.1857406744316,46.0763750702639
14.1851377985667,46.0765730737921
14.1845486946459,46.0768089154257
14.1839757347827,46.0770816455135
14.1834212260843,46.0773901658677
14.1828874013614,46.0777332341857
14.1823764101378,46.0781094690526
14.1818903099948,46.0785173555032
14.1814310582862,46.0789552511229
14.1810005042565,46.0794213926605
14.1806003815947,46.0799139031286
14.1802323014537,46.0804307993613
14.1798977459622,46.08097
14.1795980622571,46.0815293338739
14.179334457059,46.0821065487431
14.1791079918129,46.0826993203668
14.1789195784144,46.0833052618631
14.1787699755379,46.0839219333194
14.1786597855812,46.0845468516173
14.1785894522405,46.0851775004314
14.1785592587233,46.0858113403617
14.1785693266082,46.0864458191582
14.1786196153554,46.087078381999
14.1787099224699,46.0877064817767
14.1788398843168,46.0883275893551
14.1790089775856,46.0889392037533
14.1792165213973,46.0895388622159
14.1794616800465,46.09012415013
14.1797434663655,46.0906927107477
14.1800607457005,46.0912422546761
14.1804122404795,46.0917705690957
14.1807965353571,46.0922755266708
14.1812120829134,46.0927550941156
14.1816572098852,46.0932073403811
14.1821301239031,46.0936304444312
14.1826289207095,46.0940227025753
14.1831515918254,46.0943825353283
14.183696032639,46.0947084937707
14.1842600508791,46.0949992653829
14.1848413754434,46.0952536793302
14.185437665543,46.0954707111774
14.1860465201282,46.095649487014
14.1866654875564,46.0957892869726
14.1872920754643,46.0958895481283
14.1879237608034,46.0959498667647
14.188558,46.09597
</coordinates>
</LinearRing>
</outerBoundaryIs>
</Polygon>
<Polygon>
<outerBoundaryIs>
<LinearRing>
<coordinates>
14.11484,45.913477
14.1154742391966,45.9134568667647
14.1161059245357,45.9133965481283
14.1167325124436,45.9132962869726
14.1173514798718,45.913156487014
14.117960334457,45.9129777111774
14.1185566245566,45.9127606793302
14.1191379491209,45.9125062653829
14.119701967361,45.9122154937707
14.1202464081746,45.9118895353283
14.1207690792905,45.9115297025753
14.1212678760969,45.9111374444312
14.1217407901148,45.9107143403811
14.1221859170866,45.9102620941156
14.1226014646429,45.9097825266708
14.1229857595205,45.9092775690957
14.1233372542995,45.9087492546761
14.1236545336345,45.9081997107477
14.1239363199535,45.90763115013
14.1241814786027,45.9070458622159
14.1243890224144,45.9064462037533
14.1245581156832,45.9058345893551
14.1246880775301,45.9052134817767
14.1247783846446,45.904585381999
14.1248286733918,45.9039528191582
14.1248387412767,45.9033183403617
14.1248085477595,45.9026845004314
14.1247382144188,45.9020538516173
14.1246280244621,45.9014289333194
14.1244784215856,45.9008122618631
14.1242900081871,45.9002063203668
14.124063542941,45.8996135487431
14.1237999377429,45.8990363338739
14.1235002540378,45.898477
14.1231656985463,45.8979377993613
14.1227976184053,45.8974209031286
14.1223974957435,45.8969283926605
14.1219669417138,45.8964622511229
14.1215076900052,45.8960243555032
14.1210215898622,45.8956164690526
14.1205105986386,45.8952402341857
14.1199767739157,45.8948971658677
14.1194222652173,45.8945886455135
14.1188493053541,45.8943159154257
14.1182602014333,45.8940800737921
14.1176573255684,45.8938820702639
14.1170431053279,45.8937227021312
14.1164200139597,45.8936026111132
14.115790560433,45.8935222807743
14.115157279335,45.8934820345762
14.114522720665,45.8934820345762
14.113889439567,45.8935222807743
14.1132599860403,45.8936026111132
14.1126368946721,45.8937227021312
14.1120226744316,45.8938820702639
14.1114197985667,45.8940800737921
14.1108306946459,45.8943159154257
14.1102577347827,45.8945886455135
14.1097032260843,45.8948971658677
14.1091694013614,45.8952402341857
14.1086584101378,45.8956164690526
14.1081723099948,45.8960243555032
14.1077130582862,45.8964622511229
14.1072825042565,45.8969283926605
14.1068823815947,45.8974209031286
14.1065143014537,45.8979377993613
14.1061797459622,45.898477
14.1058800622571,45.8990363338739
14.105616457059,45.8996135487431
14.1053899918129,45.9002063203668
14.1052015784144,45.9008122618631
14.1050519755379,45.9014289333194
14.1049417855812,45.9020538516173
14.1048714522405,45.9026845004314
14.1048412587233,45.9033183403617
14.1048513266082,45.9039528191582
14.1049016153554,45.904585381999
14.1049919224699,45.9052134817767
14.1051218843168,45.9058345893551
14.1052909775856,45.9064462037533
14.1054985213973,45.9070458622159
14.1057436800465,45.90763115013
14.1060254663655,45.9081997107477
14.1063427457005,45.9087492546761
14.1066942404795,45.9092775690957
14.1070785353571,45.9097825266708
14.1074940829134,45.9102620941156
14.1079392098852,45.9107143403811
14.1084121239031,45.9111374444312
14.1089109207095,45.9115297025753
14.1094335918254,45.9118895353283
14.109978032639,45.9122154937707
14.1105420508791,45.9125062653829
14.1111233754434,45.9127606793302
14.111719665543,45.9129777111774
14.1123285201282,45.913156487014
14.1129474875564,45.9132962869726
14.1135740754643,45.9133965481283
14.1142057608034,45.9134568667647
14.11484,45.913477
</coordinates>
</LinearRing>
</outerBoundaryIs>
</Polygon>
<Polygon>
<outerBoundaryIs>
<LinearRing>
<coordinates>
14.2456,45.8299
14.2462342391966,45.8298798667647
14.2468659245357,45.8298195481283
14.2474925124436,45.8297192869726
14.2481114798718,45.829579487014
14.248720334457,45.8294007111774
14.2493166245566,45.8291836793302
14.2498979491209,45.8289292653829
14.250461967361,45.8286384937707
14.2510064081746,45.8283125353283
14.2515290792905,45.8279527025753
14.2520278760969,45.8275604444312
14.2525007901148,45.8271373403811
14.2529459170866,45.8266850941156
14.2533614646429,45.8262055266708
14.2537457595205,45.8257005690957
14.2540972542995,45.8251722546761
14.2544145336345,45.8246227107477
14.2546963199535,45.82405415013
14.2549414786027,45.8234688622159
14.2551490224144,45.8228692037533
14.2553181156832,45.8222575893551
14.2554480775301,45.8216364817767
14.2555383846446,45.821008381999
14.2555886733918,45.8203758191582
14.2555987412767,45.8197413403617
14.2555685477595,45.8191075004314
14.2554982144188,45.8184768516173
14.2553880244621,45.8178519333193
14.2552384215856,45.8172352618631
14.2550500081871,45.8166293203668
14.254823542941,45.8160365487431
14.2545599377429,45.8154593338739
14.2542602540378,45.8149
14.2539256985463,45.8143607993613
14.2535576184053,45.8138439031286
14.2531574957435,45.8133513926605
14.2527269417138,45.8128852511229
14.2522676900052,45.8124473555032
14.2517815898622,45.8120394690526
14.2512705986386,45.8116632341857
14.2507367739157,45.8113201658676
14.2501822652173,45.8110116455134
14.2496093053541,45.8107389154257
14.2490202014333,45.8105030737921
14.2484173255684,45.8103050702639
14.2478031053279,45.8101457021311
14.2471800139597,45.8100256111132
14.246550560433,45.8099452807743
14.245917279335,45.8099050345762
14.245282720665,45.8099050345762
14.244649439567,45.8099452807743
14.2440199860403,45.8100256111132
14.2433968946721,45.8101457021311
14.2427826744316,45.8103050702639
14.2421797985667,45.8105030737921
14.2415906946459,45.8107389154257
14.2410177347827,45.8110116455134
14.2404632260843,45.8113201658676
14.2399294013614,45.8116632341857
14.2394184101378,45.8120394690526
14.2389323099948,45.8124473555032
14.2384730582862,45.8128852511229
14.2380425042565,45.8133513926605
14.2376423815947,45.8138439031286
14.2372743014537,45.8143607993613
14.2369397459622,45.8149
14.2366400622571,45.8154593338739
14.236376457059,45.8160365487431
14.2361499918129,45.8166293203668
14.2359615784144,45.8172352618631
14.2358119755379,45.8178519333193
14.2357017855812,45.8184768516173
14.2356314522405,45.8191075004314
14.2356012587233,45.8197413403617
14.2356113266082,45.8203758191582
14.2356616153554,45.821008381999
14.2357519224699,45.8216364817767
14.2358818843168,45.8222575893551
14.2360509775856,45.8228692037533
14.2362585213973,45.8234688622159
14.2365036800465,45.82405415013
14.2367854663655,45.8246227107477
14.2371027457005,45.8251722546761
14.2374542404795,45.8257005690957
14.2378385353571,45.8262055266708
14.2382540829134,45.8266850941156
14.2386992098852,45.8271373403811
14.2391721239031,45.8275604444312
14.2396709207095,45.8279527025753
14.2401935918254,45.8283125353283
14.240738032639,45.8286384937707
14.2413020508791,45.8289292653829
14.2418833754434,45.8291836793302
14.242479665543,45.8294007111774
14.2430885201282,45.829579487014
14.2437074875564,45.8297192869726
14.2443340754643,45.8298195481283
14.2449657608034,45.8298798667647
14.2456,45.8299
</coordinates>
</LinearRing>
</outerBoundaryIs>
</Polygon>
<Polygon>
<outerBoundaryIs>
<LinearRing>
<coordinates>
14.11484,45.913477
14.1154742391966,45.9134568667647
14.1161059245357,45.9133965481283
14.1167325124436,45.9132962869726
14.1173514798718,45.913156487014
14.117960334457,45.9129777111774
14.1185566245566,45.9127606793302
14.1191379491209,45.9125062653829
14.119701967361,45.9122154937707
14.1202464081746,45.9118895353283
14.1207690792905,45.9115297025753
14.1212678760969,45.9111374444312
14.1217407901148,45.9107143403811
14.1221859170866,45.9102620941156
14.1226014646429,45.9097825266708
14.1229857595205,45.9092775690957
14.1233372542995,45.9087492546761
14.1236545336345,45.9081997107477
14.1239363199535,45.90763115013
14.1241814786027,45.9070458622159
14.1243890224144,45.9064462037533
14.1245581156832,45.9058345893551
14.1246880775301,45.9052134817767
14.1247783846446,45.904585381999
14.1248286733918,45.9039528191582
14.1248387412767,45.9033183403617
14.1248085477595,45.9026845004314
14.1247382144188,45.9020538516173
14.1246280244621,45.9014289333194
14.1244784215856,45.9008122618631
14.1242900081871,45.9002063203668
14.124063542941,45.8996135487431
14.1237999377429,45.8990363338739
14.1235002540378,45.898477
14.1231656985463,45.8979377993613
14.1227976184053,45.8974209031286
14.1223974957435,45.8969283926605
14.1219669417138,45.8964622511229
14.1215076900052,45.8960243555032
14.1210215898622,45.8956164690526
14.1205105986386,45.8952402341857
14.1199767739157,45.8948971658677
14.1194222652173,45.8945886455135
14.1188493053541,45.8943159154257
14.1182602014333,45.8940800737921
14.1176573255684,45.8938820702639
14.1170431053279,45.8937227021312
14.1164200139597,45.8936026111132
14.115790560433,45.8935222807743
14.115157279335,45.8934820345762
14.114522720665,45.8934820345762
14.113889439567,45.8935222807743
14.1132599860403,45.8936026111132
14.1126368946721,45.8937227021312
14.1120226744316,45.8938820702639
14.1114197985667,45.8940800737921
14.1108306946459,45.8943159154257
14.1102577347827,45.8945886455135
14.1097032260843,45.8948971658677
14.1091694013614,45.8952402341857
14.1086584101378,45.8956164690526
14.1081723099948,45.8960243555032
14.1077130582862,45.8964622511229
14.1072825042565,45.8969283926605
14.1068823815947,45.8974209031286
14.1065143014537,45.8979377993613
14.1061797459622,45.898477
14.1058800622571,45.8990363338739
14.105616457059,45.8996135487431
14.1053899918129,45.9002063203668
14.1052015784144,45.9008122618631
14.1050519755379,45.9014289333194
14.1049417855812,45.9020538516173
14.1048714522405,45.9026845004314
14.1048412587233,45.9033183403617
14.1048513266082,45.9039528191582
14.1049016153554,45.904585381999
14.1049919224699,45.9052134817767
14.1051218843168,45.9058345893551
14.1052909775856,45.9064462037533
14.1054985213973,45.9070458622159
14.1057436800465,45.90763115013
14.1060254663655,45.9081997107477
14.1063427457005,45.9087492546761
14.1066942404795,45.9092775690957
14.1070785353571,45.9097825266708
14.1074940829134,45.9102620941156
14.1079392098852,45.9107143403811
14.1084121239031,45.9111374444312
14.1089109207095,45.9115297025753
14.1094335918254,45.9118895353283
14.109978032639,45.9122154937707
14.1105420508791,45.9125062653829
14.1111233754434,45.9127606793302
14.111719665543,45.9129777111774
14.1123285201282,45.913156487014
14.1129474875564,45.9132962869726
14.1135740754643,45.9133965481283
14.1142057608034,45.9134568667647
14.11484,45.913477
</coordinates>
</LinearRing>
</outerBoundaryIs>
</Polygon>
</MultiGeometry>
</Placemark>
</Document>
</kml>
