# Supplementary material for: Species conservation profiles of the endemic spiders Troglohyphantes (Araneae, Linyphiidae) from the Alps and the north-western Dinarides
Source: Biodivers Data J. 2022 Aug 19;10:e87261. doi: 10.3897/BDJ.10.e87261 (PMC9848466; doi:10.3897/BDJ.10.e87261)
Supplement: Supplementary material 34 — Distribution of Troglohyphanteslatzeli Thaler, 1986 [file bdj-10-e87261-s034.kml]

<?xml version="1.0" encoding="UTF-8"?>
<kml xmlns="http://earth.google.com/kml/2.2">
<Document>
<name></name>
<description><![CDATA[]]></description>

<Style id="1">
<LineStyle>
<width>2</width>
<color>ff0000ff</color>
</LineStyle>
<PolyStyle>
<color>aaffffff</color>
<fill>1</fill>
</PolyStyle>
</Style>

<Placemark>
<name>T.latzeli.kml</name>
<description><![CDATA[]]></description>
<styleUrl>#1</styleUrl>
<visibility>1</visibility>
<MultiGeometry>
<Polygon>
<outerBoundaryIs>
<LinearRing>
<coordinates>
13.84276,46.419914
13.8433942391966,46.4198938667647
13.8440259245357,46.4198335481283
13.8446525124436,46.4197332869726
13.8452714798718,46.419593487014
13.845880334457,46.4194147111774
13.8464766245566,46.4191976793302
13.8470579491209,46.4189432653829
13.847621967361,46.4186524937707
13.8481664081746,46.4183265353283
13.8486890792905,46.4179667025753
13.8491878760969,46.4175744444312
13.8496607901148,46.4171513403811
13.8501059170866,46.4166990941156
13.8505214646429,46.4162195266708
13.8509057595205,46.4157145690957
13.8512572542995,46.4151862546761
13.8515745336345,46.4146367107477
13.8518563199535,46.41406815013
13.8521014786027,46.4134828622159
13.8523090224144,46.4128832037533
13.8524781156832,46.4122715893551
13.8526080775301,46.4116504817767
13.8526983846446,46.411022381999
13.8527486733918,46.4103898191582
13.8527587412767,46.4097553403617
13.8527285477595,46.4091215004314
13.8526582144188,46.4084908516173
13.8525480244621,46.4078659333193
13.8523984215856,46.4072492618631
13.8522100081871,46.4066433203668
13.851983542941,46.4060505487431
13.8517199377429,46.4054733338739
13.8514202540378,46.404914
13.8510856985463,46.4043747993613
13.8507176184053,46.4038579031286
13.8503174957435,46.4033653926605
13.8498869417138,46.4028992511229
13.8494276900052,46.4024613555032
13.8489415898622,46.4020534690526
13.8484305986386,46.4016772341857
13.8478967739157,46.4013341658677
13.8473422652173,46.4010256455134
13.8467693053541,46.4007529154257
13.8461802014333,46.4005170737921
13.8455773255684,46.4003190702639
13.8449631053279,46.4001597021311
13.8443400139597,46.4000396111132
13.843710560433,46.3999592807743
13.843077279335,46.3999190345762
13.842442720665,46.3999190345762
13.841809439567,46.3999592807743
13.8411799860403,46.4000396111132
13.8405568946721,46.4001597021311
13.8399426744316,46.4003190702639
13.8393397985667,46.4005170737921
13.8387506946459,46.4007529154257
13.8381777347827,46.4010256455134
13.8376232260843,46.4013341658677
13.8370894013614,46.4016772341857
13.8365784101378,46.4020534690526
13.8360923099948,46.4024613555032
13.8356330582862,46.4028992511229
13.8352025042565,46.4033653926605
13.8348023815947,46.4038579031286
13.8344343014537,46.4043747993613
13.8340997459622,46.404914
13.8338000622571,46.4054733338739
13.833536457059,46.4060505487431
13.8333099918129,46.4066433203668
13.8331215784144,46.4072492618631
13.8329719755379,46.4078659333193
13.8328617855812,46.4084908516173
13.8327914522405,46.4091215004314
13.8327612587233,46.4097553403617
13.8327713266082,46.4103898191582
13.8328216153554,46.411022381999
13.8329119224699,46.4116504817767
13.8330418843168,46.4122715893551
13.8332109775856,46.4128832037533
13.8334185213973,46.4134828622159
13.8336636800465,46.41406815013
13.8339454663655,46.4146367107477
13.8342627457005,46.4151862546761
13.8346142404795,46.4157145690957
13.8349985353571,46.4162195266708
13.8354140829134,46.4166990941156
13.8358592098852,46.4171513403811
13.8363321239031,46.4175744444312
13.8368309207095,46.4179667025753
13.8373535918254,46.4183265353283
13.837898032639,46.4186524937707
13.8384620508791,46.4189432653829
13.8390433754434,46.4191976793302
13.839639665543,46.4194147111774
13.8402485201282,46.419593487014
13.8408674875564,46.4197332869726
13.8414940754643,46.4198335481283
13.8421257608034,46.4198938667647
13.84276,46.419914
</coordinates>
</LinearRing>
</outerBoundaryIs>
</Polygon>
<Polygon>
<outerBoundaryIs>
<LinearRing>
<coordinates>
14.233333,46.493333
14.2339672391966,46.4933128667647
14.2345989245357,46.4932525481283
14.2352255124436,46.4931522869726
14.2358444798718,46.493012487014
14.236453334457,46.4928337111774
14.2370496245566,46.4926166793302
14.2376309491209,46.4923622653829
14.238194967361,46.4920714937707
14.2387394081746,46.4917455353283
14.2392620792905,46.4913857025753
14.2397608760969,46.4909934444312
14.2402337901148,46.4905703403811
14.2406789170866,46.4901180941156
14.2410944646429,46.4896385266708
14.2414787595205,46.4891335690957
14.2418302542995,46.4886052546761
14.2421475336345,46.4880557107477
14.2424293199535,46.48748715013
14.2426744786027,46.4869018622159
14.2428820224144,46.4863022037533
14.2430511156832,46.4856905893551
14.2431810775301,46.4850694817767
14.2432713846446,46.484441381999
14.2433216733918,46.4838088191582
14.2433317412767,46.4831743403617
14.2433015477595,46.4825405004314
14.2432312144188,46.4819098516173
14.2431210244621,46.4812849333194
14.2429714215856,46.4806682618631
14.2427830081871,46.4800623203668
14.242556542941,46.4794695487431
14.2422929377429,46.4788923338739
14.2419932540378,46.478333
14.2416586985463,46.4777937993613
14.2412906184053,46.4772769031286
14.2408904957435,46.4767843926605
14.2404599417138,46.4763182511229
14.2400006900052,46.4758803555032
14.2395145898622,46.4754724690526
14.2390035986386,46.4750962341857
14.2384697739157,46.4747531658677
14.2379152652173,46.4744446455135
14.2373423053541,46.4741719154257
14.2367532014333,46.4739360737921
14.2361503255684,46.4737380702639
14.2355361053279,46.4735787021311
14.2349130139597,46.4734586111132
14.234283560433,46.4733782807743
14.233650279335,46.4733380345762
14.233015720665,46.4733380345762
14.232382439567,46.4733782807743
14.2317529860403,46.4734586111132
14.2311298946721,46.4735787021311
14.2305156744316,46.4737380702639
14.2299127985667,46.4739360737921
14.2293236946459,46.4741719154257
14.2287507347827,46.4744446455135
14.2281962260843,46.4747531658677
14.2276624013614,46.4750962341857
14.2271514101378,46.4754724690526
14.2266653099948,46.4758803555032
14.2262060582862,46.4763182511229
14.2257755042565,46.4767843926605
14.2253753815947,46.4772769031286
14.2250073014537,46.4777937993613
14.2246727459622,46.478333
14.2243730622571,46.4788923338739
14.224109457059,46.4794695487431
14.2238829918129,46.4800623203668
14.2236945784144,46.4806682618631
14.2235449755379,46.4812849333194
14.2234347855812,46.4819098516173
14.2233644522405,46.4825405004314
14.2233342587233,46.4831743403617
14.2233443266082,46.4838088191582
14.2233946153554,46.484441381999
14.2234849224699,46.4850694817767
14.2236148843168,46.4856905893551
14.2237839775856,46.4863022037533
14.2239915213973,46.4869018622159
14.2242366800465,46.48748715013
14.2245184663655,46.4880557107477
14.2248357457005,46.4886052546761
14.2251872404795,46.4891335690957
14.2255715353571,46.4896385266708
14.2259870829134,46.4901180941156
14.2264322098852,46.4905703403811
14.2269051239031,46.4909934444312
14.2274039207095,46.4913857025753
14.2279265918254,46.4917455353283
14.228471032639,46.4920714937707
14.2290350508791,46.4923622653829
14.2296163754434,46.4926166793302
14.230212665543,46.4928337111774
14.2308215201282,46.493012487014
14.2314404875564,46.4931522869726
14.2320670754643,46.4932525481283
14.2326987608034,46.4933128667647
14.233333,46.493333
</coordinates>
</LinearRing>
</outerBoundaryIs>
</Polygon>
<Polygon>
<outerBoundaryIs>
<LinearRing>
<coordinates>
13.739167,46.5975
13.7398012391966,46.5974798667647
13.7404329245357,46.5974195481283
13.7410595124436,46.5973192869726
13.7416784798718,46.597179487014
13.742287334457,46.5970007111774
13.7428836245566,46.5967836793302
13.7434649491209,46.5965292653829
13.744028967361,46.5962384937707
13.7445734081746,46.5959125353283
13.7450960792905,46.5955527025753
13.7455948760969,46.5951604444312
13.7460677901148,46.5947373403811
13.7465129170866,46.5942850941156
13.7469284646429,46.5938055266708
13.7473127595205,46.5933005690957
13.7476642542995,46.5927722546761
13.7479815336345,46.5922227107477
13.7482633199535,46.59165415013
13.7485084786027,46.5910688622159
13.7487160224144,46.5904692037533
13.7488851156832,46.5898575893551
13.7490150775301,46.5892364817767
13.7491053846446,46.588608381999
13.7491556733918,46.5879758191582
13.7491657412767,46.5873413403617
13.7491355477595,46.5867075004314
13.7490652144188,46.5860768516173
13.7489550244621,46.5854519333193
13.7488054215856,46.5848352618631
13.7486170081871,46.5842293203668
13.748390542941,46.5836365487431
13.7481269377429,46.5830593338739
13.7478272540378,46.5825
13.7474926985463,46.5819607993613
13.7471246184053,46.5814439031286
13.7467244957435,46.5809513926605
13.7462939417138,46.5804852511229
13.7458346900052,46.5800473555032
13.7453485898622,46.5796394690526
13.7448375986386,46.5792632341857
13.7443037739157,46.5789201658677
13.7437492652173,46.5786116455134
13.7431763053541,46.5783389154257
13.7425872014333,46.5781030737921
13.7419843255684,46.5779050702639
13.7413701053279,46.5777457021311
13.7407470139597,46.5776256111132
13.740117560433,46.5775452807743
13.739484279335,46.5775050345762
13.738849720665,46.5775050345762
13.738216439567,46.5775452807743
13.7375869860403,46.5776256111132
13.7369638946721,46.5777457021311
13.7363496744316,46.5779050702639
13.7357467985667,46.5781030737921
13.7351576946459,46.5783389154257
13.7345847347827,46.5786116455134
13.7340302260843,46.5789201658677
13.7334964013614,46.5792632341857
13.7329854101378,46.5796394690526
13.7324993099948,46.5800473555032
13.7320400582862,46.5804852511229
13.7316095042565,46.5809513926605
13.7312093815947,46.5814439031286
13.7308413014537,46.5819607993613
13.7305067459622,46.5825
13.7302070622571,46.5830593338739
13.729943457059,46.5836365487431
13.7297169918129,46.5842293203668
13.7295285784144,46.5848352618631
13.7293789755379,46.5854519333193
13.7292687855812,46.5860768516173
13.7291984522405,46.5867075004314
13.7291682587233,46.5873413403617
13.7291783266082,46.5879758191582
13.7292286153554,46.588608381999
13.7293189224699,46.5892364817767
13.7294488843168,46.5898575893551
13.7296179775856,46.5904692037533
13.7298255213973,46.5910688622159
13.7300706800465,46.59165415013
13.7303524663655,46.5922227107477
13.7306697457005,46.5927722546761
13.7310212404795,46.5933005690957
13.7314055353571,46.5938055266708
13.7318210829134,46.5942850941156
13.7322662098852,46.5947373403811
13.7327391239031,46.5951604444312
13.7332379207095,46.5955527025753
13.7337605918254,46.5959125353283
13.734305032639,46.5962384937707
13.7348690508791,46.5965292653829
13.7354503754434,46.5967836793302
13.736046665543,46.5970007111774
13.7366555201282,46.597179487014
13.7372744875564,46.5973192869726
13.7379010754643,46.5974195481283
13.7385327608034,46.5974798667647
13.739167,46.5975
</coordinates>
</LinearRing>
</outerBoundaryIs>
</Polygon>
<Polygon>
<outerBoundaryIs>
<LinearRing>
<coordinates>
14.216667,46.476667
14.2173012391966,46.4766468667647
14.2179329245357,46.4765865481283
14.2185595124436,46.4764862869726
14.2191784798718,46.476346487014
14.219787334457,46.4761677111774
14.2203836245566,46.4759506793302
14.2209649491209,46.4756962653829
14.221528967361,46.4754054937707
14.2220734081746,46.4750795353283
14.2225960792905,46.4747197025753
14.2230948760969,46.4743274444312
14.2235677901148,46.4739043403811
14.2240129170866,46.4734520941156
14.2244284646429,46.4729725266708
14.2248127595205,46.4724675690957
14.2251642542995,46.4719392546761
14.2254815336345,46.4713897107477
14.2257633199535,46.47082115013
14.2260084786027,46.4702358622159
14.2262160224144,46.4696362037533
14.2263851156832,46.4690245893551
14.2265150775301,46.4684034817767
14.2266053846446,46.467775381999
14.2266556733918,46.4671428191582
14.2266657412767,46.4665083403617
14.2266355477595,46.4658745004314
14.2265652144188,46.4652438516173
14.2264550244621,46.4646189333194
14.2263054215856,46.4640022618631
14.2261170081871,46.4633963203668
14.225890542941,46.4628035487431
14.2256269377429,46.4622263338739
14.2253272540378,46.461667
14.2249926985463,46.4611277993613
14.2246246184053,46.4606109031286
14.2242244957435,46.4601183926605
14.2237939417138,46.4596522511229
14.2233346900052,46.4592143555032
14.2228485898622,46.4588064690526
14.2223375986386,46.4584302341857
14.2218037739157,46.4580871658677
14.2212492652173,46.4577786455135
14.2206763053541,46.4575059154257
14.2200872014333,46.4572700737921
14.2194843255684,46.4570720702639
14.2188701053279,46.4569127021311
14.2182470139597,46.4567926111132
14.217617560433,46.4567122807743
14.216984279335,46.4566720345762
14.216349720665,46.4566720345762
14.215716439567,46.4567122807743
14.2150869860403,46.4567926111132
14.2144638946721,46.4569127021311
14.2138496744316,46.4570720702639
14.2132467985667,46.4572700737921
14.2126576946459,46.4575059154257
14.2120847347827,46.4577786455135
14.2115302260843,46.4580871658677
14.2109964013614,46.4584302341857
14.2104854101378,46.4588064690526
14.2099993099948,46.4592143555032
14.2095400582862,46.4596522511229
14.2091095042565,46.4601183926605
14.2087093815947,46.4606109031286
14.2083413014537,46.4611277993613
14.2080067459622,46.461667
14.2077070622571,46.4622263338739
14.207443457059,46.4628035487431
14.2072169918129,46.4633963203668
14.2070285784144,46.4640022618631
14.2068789755379,46.4646189333194
14.2067687855812,46.4652438516173
14.2066984522405,46.4658745004314
14.2066682587233,46.4665083403617
14.2066783266082,46.4671428191582
14.2067286153554,46.467775381999
14.2068189224699,46.4684034817767
14.2069488843168,46.4690245893551
14.2071179775856,46.4696362037533
14.2073255213973,46.4702358622159
14.2075706800465,46.47082115013
14.2078524663655,46.4713897107477
14.2081697457005,46.4719392546761
14.2085212404795,46.4724675690957
14.2089055353571,46.4729725266708
14.2093210829134,46.4734520941156
14.2097662098852,46.4739043403811
14.2102391239031,46.4743274444312
14.2107379207095,46.4747197025753
14.2112605918254,46.4750795353283
14.211805032639,46.4754054937707
14.2123690508791,46.4756962653829
14.2129503754434,46.4759506793302
14.213546665543,46.4761677111774
14.2141555201282,46.476346487014
14.2147744875564,46.4764862869726
14.2154010754643,46.4765865481283
14.2160327608034,46.4766468667647
14.216667,46.476667
</coordinates>
</LinearRing>
</outerBoundaryIs>
</Polygon>
<Polygon>
<outerBoundaryIs>
<LinearRing>
<coordinates>
14.16677,46.45656
14.1674042391966,46.4565398667647
14.1680359245357,46.4564795481283
14.1686625124436,46.4563792869726
14.1692814798718,46.456239487014
14.169890334457,46.4560607111774
14.1704866245566,46.4558436793302
14.1710679491209,46.4555892653829
14.171631967361,46.4552984937707
14.1721764081746,46.4549725353283
14.1726990792905,46.4546127025753
14.1731978760969,46.4542204444312
14.1736707901148,46.4537973403811
14.1741159170866,46.4533450941156
14.1745314646429,46.4528655266708
14.1749157595205,46.4523605690957
14.1752672542995,46.4518322546761
14.1755845336345,46.4512827107477
14.1758663199535,46.45071415013
14.1761114786027,46.4501288622159
14.1763190224144,46.4495292037533
14.1764881156832,46.4489175893551
14.1766180775301,46.4482964817767
14.1767083846446,46.447668381999
14.1767586733918,46.4470358191582
14.1767687412767,46.4464013403617
14.1767385477595,46.4457675004314
14.1766682144188,46.4451368516173
14.1765580244621,46.4445119333193
14.1764084215856,46.4438952618631
14.1762200081871,46.4432893203668
14.175993542941,46.4426965487431
14.1757299377429,46.4421193338739
14.1754302540378,46.44156
14.1750956985463,46.4410207993613
14.1747276184053,46.4405039031286
14.1743274957435,46.4400113926605
14.1738969417138,46.4395452511229
14.1734376900052,46.4391073555032
14.1729515898622,46.4386994690526
14.1724405986386,46.4383232341857
14.1719067739157,46.4379801658676
14.1713522652173,46.4376716455134
14.1707793053541,46.4373989154257
14.1701902014333,46.4371630737921
14.1695873255684,46.4369650702639
14.1689731053279,46.4368057021311
14.1683500139597,46.4366856111132
14.167720560433,46.4366052807743
14.167087279335,46.4365650345762
14.166452720665,46.4365650345762
14.165819439567,46.4366052807743
14.1651899860403,46.4366856111132
14.1645668946721,46.4368057021311
14.1639526744316,46.4369650702639
14.1633497985667,46.4371630737921
14.1627606946459,46.4373989154257
14.1621877347827,46.4376716455134
14.1616332260843,46.4379801658676
14.1610994013614,46.4383232341857
14.1605884101378,46.4386994690526
14.1601023099948,46.4391073555032
14.1596430582862,46.4395452511229
14.1592125042565,46.4400113926605
14.1588123815947,46.4405039031286
14.1584443014537,46.4410207993613
14.1581097459622,46.44156
14.1578100622571,46.4421193338739
14.157546457059,46.4426965487431
14.1573199918129,46.4432893203668
14.1571315784144,46.4438952618631
14.1569819755379,46.4445119333193
14.1568717855812,46.4451368516173
14.1568014522405,46.4457675004314
14.1567712587233,46.4464013403617
14.1567813266082,46.4470358191582
14.1568316153554,46.447668381999
14.1569219224699,46.4482964817767
14.1570518843168,46.4489175893551
14.1572209775856,46.4495292037533
14.1574285213973,46.4501288622159
14.1576736800465,46.45071415013
14.1579554663655,46.4512827107477
14.1582727457005,46.4518322546761
14.1586242404795,46.4523605690957
14.1590085353571,46.4528655266708
14.1594240829134,46.4533450941156
14.1598692098852,46.4537973403811
14.1603421239031,46.4542204444312
14.1608409207095,46.4546127025753
14.1613635918254,46.4549725353283
14.161908032639,46.4552984937707
14.1624720508791,46.4555892653829
14.1630533754434,46.4558436793302
14.163649665543,46.4560607111774
14.1642585201282,46.456239487014
14.1648774875564,46.4563792869726
14.1655040754643,46.4564795481283
14.1661357608034,46.4565398667647
14.16677,46.45656
</coordinates>
</LinearRing>
</outerBoundaryIs>
</Polygon>
<Polygon>
<outerBoundaryIs>
<LinearRing>
<coordinates>
14.216667,46.493333
14.2173012391966,46.4933128667647
14.2179329245357,46.4932525481283
14.2185595124436,46.4931522869726
14.2191784798718,46.493012487014
14.219787334457,46.4928337111774
14.2203836245566,46.4926166793302
14.2209649491209,46.4923622653829
14.221528967361,46.4920714937707
14.2220734081746,46.4917455353283
14.2225960792905,46.4913857025753
14.2230948760969,46.4909934444312
14.2235677901148,46.4905703403811
14.2240129170866,46.4901180941156
14.2244284646429,46.4896385266708
14.2248127595205,46.4891335690957
14.2251642542995,46.4886052546761
14.2254815336345,46.4880557107477
14.2257633199535,46.48748715013
14.2260084786027,46.4869018622159
14.2262160224144,46.4863022037533
14.2263851156832,46.4856905893551
14.2265150775301,46.4850694817767
14.2266053846446,46.484441381999
14.2266556733918,46.4838088191582
14.2266657412767,46.4831743403617
14.2266355477595,46.4825405004314
14.2265652144188,46.4819098516173
14.2264550244621,46.4812849333194
14.2263054215856,46.4806682618631
14.2261170081871,46.4800623203668
14.225890542941,46.4794695487431
14.2256269377429,46.4788923338739
14.2253272540378,46.478333
14.2249926985463,46.4777937993613
14.2246246184053,46.4772769031286
14.2242244957435,46.4767843926605
14.2237939417138,46.4763182511229
14.2233346900052,46.4758803555032
14.2228485898622,46.4754724690526
14.2223375986386,46.4750962341857
14.2218037739157,46.4747531658677
14.2212492652173,46.4744446455135
14.2206763053541,46.4741719154257
14.2200872014333,46.4739360737921
14.2194843255684,46.4737380702639
14.2188701053279,46.4735787021311
14.2182470139597,46.4734586111132
14.217617560433,46.4733782807743
14.216984279335,46.4733380345762
14.216349720665,46.4733380345762
14.215716439567,46.4733782807743
14.2150869860403,46.4734586111132
14.2144638946721,46.4735787021311
14.2138496744316,46.4737380702639
14.2132467985667,46.4739360737921
14.2126576946459,46.4741719154257
14.2120847347827,46.4744446455135
14.2115302260843,46.4747531658677
14.2109964013614,46.4750962341857
14.2104854101378,46.4754724690526
14.2099993099948,46.4758803555032
14.2095400582862,46.4763182511229
14.2091095042565,46.4767843926605
14.2087093815947,46.4772769031286
14.2083413014537,46.4777937993613
14.2080067459622,46.478333
14.2077070622571,46.4788923338739
14.207443457059,46.4794695487431
14.2072169918129,46.4800623203668
14.2070285784144,46.4806682618631
14.2068789755379,46.4812849333194
14.2067687855812,46.4819098516173
14.2066984522405,46.4825405004314
14.2066682587233,46.4831743403617
14.2066783266082,46.4838088191582
14.2067286153554,46.484441381999
14.2068189224699,46.4850694817767
14.2069488843168,46.4856905893551
14.2071179775856,46.4863022037533
14.2073255213973,46.4869018622159
14.2075706800465,46.48748715013
14.2078524663655,46.4880557107477
14.2081697457005,46.4886052546761
14.2085212404795,46.4891335690957
14.2089055353571,46.4896385266708
14.2093210829134,46.4901180941156
14.2097662098852,46.4905703403811
14.2102391239031,46.4909934444312
14.2107379207095,46.4913857025753
14.2112605918254,46.4917455353283
14.211805032639,46.4920714937707
14.2123690508791,46.4923622653829
14.2129503754434,46.4926166793302
14.213546665543,46.4928337111774
14.2141555201282,46.493012487014
14.2147744875564,46.4931522869726
14.2154010754643,46.4932525481283
14.2160327608034,46.4933128667647
14.216667,46.493333
</coordinates>
</LinearRing>
</outerBoundaryIs>
</Polygon>
<Polygon>
<outerBoundaryIs>
<LinearRing>
<coordinates>
13.76526,46.45319
13.7658942391966,46.4531698667647
13.7665259245357,46.4531095481283
13.7671525124436,46.4530092869726
13.7677714798718,46.452869487014
13.768380334457,46.4526907111774
13.7689766245566,46.4524736793302
13.7695579491209,46.4522192653829
13.770121967361,46.4519284937707
13.7706664081746,46.4516025353283
13.7711890792905,46.4512427025753
13.7716878760969,46.4508504444312
13.7721607901148,46.4504273403811
13.7726059170866,46.4499750941156
13.7730214646429,46.4494955266708
13.7734057595205,46.4489905690957
13.7737572542995,46.4484622546761
13.7740745336345,46.4479127107477
13.7743563199535,46.44734415013
13.7746014786027,46.4467588622159
13.7748090224144,46.4461592037533
13.7749781156832,46.4455475893551
13.7751080775301,46.4449264817767
13.7751983846446,46.444298381999
13.7752486733918,46.4436658191582
13.7752587412767,46.4430313403617
13.7752285477595,46.4423975004314
13.7751582144188,46.4417668516173
13.7750480244621,46.4411419333194
13.7748984215856,46.4405252618631
13.7747100081871,46.4399193203668
13.774483542941,46.4393265487431
13.7742199377429,46.4387493338739
13.7739202540378,46.43819
13.7735856985463,46.4376507993613
13.7732176184053,46.4371339031286
13.7728174957435,46.4366413926605
13.7723869417138,46.4361752511229
13.7719276900052,46.4357373555032
13.7714415898622,46.4353294690526
13.7709305986386,46.4349532341857
13.7703967739157,46.4346101658677
13.7698422652173,46.4343016455135
13.7692693053541,46.4340289154257
13.7686802014333,46.4337930737921
13.7680773255684,46.4335950702639
13.7674631053279,46.4334357021311
13.7668400139597,46.4333156111132
13.766210560433,46.4332352807743
13.765577279335,46.4331950345762
13.764942720665,46.4331950345762
13.764309439567,46.4332352807743
13.7636799860403,46.4333156111132
13.7630568946721,46.4334357021311
13.7624426744316,46.4335950702639
13.7618397985667,46.4337930737921
13.7612506946459,46.4340289154257
13.7606777347827,46.4343016455135
13.7601232260843,46.4346101658677
13.7595894013614,46.4349532341857
13.7590784101378,46.4353294690526
13.7585923099948,46.4357373555032
13.7581330582862,46.4361752511229
13.7577025042565,46.4366413926605
13.7573023815947,46.4371339031286
13.7569343014537,46.4376507993613
13.7565997459622,46.43819
13.7563000622571,46.4387493338739
13.756036457059,46.4393265487431
13.7558099918129,46.4399193203668
13.7556215784144,46.4405252618631
13.7554719755379,46.4411419333194
13.7553617855812,46.4417668516173
13.7552914522405,46.4423975004314
13.7552612587233,46.4430313403617
13.7552713266082,46.4436658191582
13.7553216153554,46.444298381999
13.7554119224699,46.4449264817767
13.7555418843168,46.4455475893551
13.7557109775856,46.4461592037533
13.7559185213973,46.4467588622159
13.7561636800465,46.44734415013
13.7564454663655,46.4479127107477
13.7567627457005,46.4484622546761
13.7571142404795,46.4489905690957
13.7574985353571,46.4494955266708
13.7579140829134,46.4499750941156
13.7583592098852,46.4504273403811
13.7588321239031,46.4508504444312
13.7593309207095,46.4512427025753
13.7598535918254,46.4516025353283
13.760398032639,46.4519284937707
13.7609620508791,46.4522192653829
13.7615433754434,46.4524736793302
13.762139665543,46.4526907111774
13.7627485201282,46.452869487014
13.7633674875564,46.4530092869726
13.7639940754643,46.4531095481283
13.7646257608034,46.4531698667647
13.76526,46.45319
</coordinates>
</LinearRing>
</outerBoundaryIs>
</Polygon>
<Polygon>
<outerBoundaryIs>
<LinearRing>
<coordinates>
14.269167,46.498889
14.2698012391966,46.4988688667647
14.2704329245357,46.4988085481283
14.2710595124436,46.4987082869726
14.2716784798718,46.498568487014
14.272287334457,46.4983897111774
14.2728836245566,46.4981726793302
14.2734649491209,46.4979182653829
14.274028967361,46.4976274937707
14.2745734081746,46.4973015353283
14.2750960792905,46.4969417025753
14.2755948760969,46.4965494444312
14.2760677901148,46.4961263403811
14.2765129170866,46.4956740941156
14.2769284646429,46.4951945266708
14.2773127595205,46.4946895690957
14.2776642542995,46.4941612546761
14.2779815336345,46.4936117107477
14.2782633199535,46.49304315013
14.2785084786027,46.4924578622159
14.2787160224144,46.4918582037533
14.2788851156832,46.4912465893551
14.2790150775301,46.4906254817767
14.2791053846446,46.489997381999
14.2791556733918,46.4893648191582
14.2791657412767,46.4887303403617
14.2791355477595,46.4880965004314
14.2790652144188,46.4874658516173
14.2789550244621,46.4868409333193
14.2788054215856,46.4862242618631
14.2786170081871,46.4856183203668
14.278390542941,46.4850255487431
14.2781269377429,46.4844483338739
14.2778272540378,46.483889
14.2774926985463,46.4833497993613
14.2771246184053,46.4828329031286
14.2767244957435,46.4823403926605
14.2762939417138,46.4818742511229
14.2758346900052,46.4814363555032
14.2753485898622,46.4810284690526
14.2748375986386,46.4806522341857
14.2743037739157,46.4803091658677
14.2737492652173,46.4800006455134
14.2731763053541,46.4797279154257
14.2725872014333,46.4794920737921
14.2719843255684,46.4792940702639
14.2713701053279,46.4791347021311
14.2707470139597,46.4790146111132
14.270117560433,46.4789342807743
14.269484279335,46.4788940345762
14.268849720665,46.4788940345762
14.268216439567,46.4789342807743
14.2675869860403,46.4790146111132
14.2669638946721,46.4791347021311
14.2663496744316,46.4792940702639
14.2657467985667,46.4794920737921
14.2651576946459,46.4797279154257
14.2645847347827,46.4800006455134
14.2640302260843,46.4803091658677
14.2634964013614,46.4806522341857
14.2629854101378,46.4810284690526
14.2624993099948,46.4814363555032
14.2620400582862,46.4818742511229
14.2616095042565,46.4823403926605
14.2612093815947,46.4828329031286
14.2608413014537,46.4833497993613
14.2605067459622,46.483889
14.2602070622571,46.4844483338739
14.259943457059,46.4850255487431
14.2597169918129,46.4856183203668
14.2595285784144,46.4862242618631
14.2593789755379,46.4868409333193
14.2592687855812,46.4874658516173
14.2591984522405,46.4880965004314
14.2591682587233,46.4887303403617
14.2591783266082,46.4893648191582
14.2592286153554,46.489997381999
14.2593189224699,46.4906254817767
14.2594488843168,46.4912465893551
14.2596179775856,46.4918582037533
14.2598255213973,46.4924578622159
14.2600706800465,46.49304315013
14.2603524663655,46.4936117107477
14.2606697457005,46.4941612546761
14.2610212404795,46.4946895690957
14.2614055353571,46.4951945266708
14.2618210829134,46.4956740941156
14.2622662098852,46.4961263403811
14.2627391239031,46.4965494444312
14.2632379207095,46.4969417025753
14.2637605918254,46.4973015353283
14.264305032639,46.4976274937707
14.2648690508791,46.4979182653829
14.2654503754434,46.4981726793302
14.266046665543,46.4983897111774
14.2666555201282,46.498568487014
14.2672744875564,46.4987082869726
14.2679010754643,46.4988085481283
14.2685327608034,46.4988688667647
14.269167,46.498889
</coordinates>
</LinearRing>
</outerBoundaryIs>
</Polygon>
<Polygon>
<outerBoundaryIs>
<LinearRing>
<coordinates>
13.709167,46.569444
13.7098012391966,46.5694238667647
13.7104329245357,46.5693635481283
13.7110595124436,46.5692632869726
13.7116784798718,46.569123487014
13.712287334457,46.5689447111774
13.7128836245566,46.5687276793302
13.7134649491209,46.5684732653829
13.714028967361,46.5681824937707
13.7145734081746,46.5678565353283
13.7150960792905,46.5674967025753
13.7155948760969,46.5671044444312
13.7160677901148,46.5666813403811
13.7165129170866,46.5662290941156
13.7169284646429,46.5657495266708
13.7173127595205,46.5652445690957
13.7176642542995,46.5647162546761
13.7179815336345,46.5641667107477
13.7182633199535,46.56359815013
13.7185084786027,46.5630128622159
13.7187160224144,46.5624132037533
13.7188851156832,46.5618015893551
13.7190150775301,46.5611804817767
13.7191053846446,46.560552381999
13.7191556733918,46.5599198191582
13.7191657412767,46.5592853403617
13.7191355477595,46.5586515004314
13.7190652144188,46.5580208516173
13.7189550244621,46.5573959333193
13.7188054215856,46.5567792618631
13.7186170081871,46.5561733203668
13.718390542941,46.5555805487431
13.7181269377429,46.5550033338739
13.7178272540378,46.554444
13.7174926985463,46.5539047993613
13.7171246184053,46.5533879031286
13.7167244957435,46.5528953926605
13.7162939417138,46.5524292511229
13.7158346900052,46.5519913555032
13.7153485898622,46.5515834690526
13.7148375986386,46.5512072341857
13.7143037739157,46.5508641658677
13.7137492652173,46.5505556455134
13.7131763053541,46.5502829154257
13.7125872014333,46.5500470737921
13.7119843255684,46.5498490702639
13.7113701053279,46.5496897021311
13.7107470139597,46.5495696111132
13.710117560433,46.5494892807743
13.709484279335,46.5494490345762
13.708849720665,46.5494490345762
13.708216439567,46.5494892807743
13.7075869860403,46.5495696111132
13.7069638946721,46.5496897021311
13.7063496744316,46.5498490702639
13.7057467985667,46.5500470737921
13.7051576946459,46.5502829154257
13.7045847347827,46.5505556455134
13.7040302260843,46.5508641658677
13.7034964013614,46.5512072341857
13.7029854101378,46.5515834690526
13.7024993099948,46.5519913555032
13.7020400582862,46.5524292511229
13.7016095042565,46.5528953926605
13.7012093815947,46.5533879031286
13.7008413014537,46.5539047993613
13.7005067459622,46.554444
13.7002070622571,46.5550033338739
13.699943457059,46.5555805487431
13.6997169918129,46.5561733203668
13.6995285784144,46.5567792618631
13.6993789755379,46.5573959333193
13.6992687855812,46.5580208516173
13.6991984522405,46.5586515004314
13.6991682587233,46.5592853403617
13.6991783266082,46.5599198191582
13.6992286153554,46.560552381999
13.6993189224699,46.5611804817767
13.6994488843168,46.5618015893551
13.6996179775856,46.5624132037533
13.6998255213973,46.5630128622159
13.7000706800465,46.56359815013
13.7003524663655,46.5641667107477
13.7006697457005,46.5647162546761
13.7010212404795,46.5652445690957
13.7014055353571,46.5657495266708
13.7018210829134,46.5662290941156
13.7022662098852,46.5666813403811
13.7027391239031,46.5671044444312
13.7032379207095,46.5674967025753
13.7037605918254,46.5678565353283
13.704305032639,46.5681824937707
13.7048690508791,46.5684732653829
13.7054503754434,46.5687276793302
13.706046665543,46.5689447111774
13.7066555201282,46.569123487014
13.7072744875564,46.5692632869726
13.7079010754643,46.5693635481283
13.7085327608034,46.5694238667647
13.709167,46.569444
</coordinates>
</LinearRing>
</outerBoundaryIs>
</Polygon>
</MultiGeometry>
</Placemark>
</Document>
</kml>
